# Supplementary material for: Canopy parkour: movement ecology of post-hatch dispersal in a gliding nymphal stick insect ( Extatosoma tiaratum )
Source: Oxford University Press journal article supplement (doi:10.1242/jeb.226266), 2020-01-01
Supplement: jeb226266supp.pdf [file jeb226266supp.pdf]

**Table S1. Detailed frequency data for Figs 2–6.**[Click here to Download Table S1](#)**Table S2.** Statistical results of movement direction in visual contrast experiments.  $f_D$ , the frequency of moving towards the darker surface in each setup, excluding those overlapped with contrast edges. G-values are presented with d.f. and  $P$ -values in parentheses (\*,  $P < 0.05$ ; \*\*,  $P < 0.01$ ; \*\*\*,  $P < 0.001$ ). See Fig. 4.

| setup | N   | von Mises distribution |                          | $f_D$ (%) | repeated G-test with William's correction |                     |                       |
|-------|-----|------------------------|--------------------------|-----------|-------------------------------------------|---------------------|-----------------------|
|       |     | $\mu$ (95%CI)          | $\kappa$ (95%CI)         |           | $G_{total}$                               | $G_{pool}$          | $G_{heterogeneity}$   |
| BW11  | 100 | -0.06 (6.19, 6.25)     | 32.38 (20.4, 57.3)       | 57.1      | 35.8 (23 d.f., *)                         | 2.0 (1 d.f., 0.158) | 33.8 (22 d.f., 0.051) |
| BG11  | 188 | 0.01 (0.01, 0.02)      | 727.07 (563.47, 1046.45) | 37.7      | 60.4 (38 d.f., *)                         | 7.42 (1 d.f., **)   | 53.0 (37 d.f., *)     |
| GW11  | 127 | -0.03 (6.25, 6.27)     | 251.96 (200.78, 340.94)  | 75.7      | 72.2 (26 d.f., ***)                       | 30.6 (1 d.f., ***)  | 41.6 (25 d.f., *)     |
| BW19  | 100 | -0.05 (6.22, 6.24)     | 265.08 (206.68, 372.66)  | 85.4      | 73.8 (20 d.f., ***)                       | 49.1 (1 d.f., ***)  | 24.7 (19 d.f., 0.170) |
| BW91  | 95  | 0.05 (0.04, 0.07)      | 243.61 (191.89, 329.1)   | 19.8      | 57.5 (19 d.f., ***)                       | 33.5 (1 d.f., ***)  | 24.0 (18 d.f., 0.155) |

**Table S3.** Statistical results of movement direction in visual contrast experiments.  $f_D$ , the frequency of moving towards the darker surface in each setup, excluding those overlapped with contrast edges. G-values are presented with d.f. and  $P$ -values in parentheses (\*,  $P < 0.05$ ; \*\*,  $P < 0.01$ ; \*\*\*,  $P < 0.001$ ). See Fig. 4.

| setup | N   | $f_{stripe}$ (%) | repeated G-test with William's correction |                     |                       |
|-------|-----|------------------|-------------------------------------------|---------------------|-----------------------|
|       |     |                  | $G_{total}$                               | $G_{pool}$          | $G_{heterogeneity}$   |
| BW91  | 95  | 82               | 43.48 (9 d.f., **)                        | 20.08 (1 d.f., ***) | 23.4 (18 d.f., 0.18)  |
| BW19  | 100 | 76               | 86.49 (20 d.f., ***)                      | 61.04 (1 d.f., ***) | 25.45 (19 d.f., 0.15) |

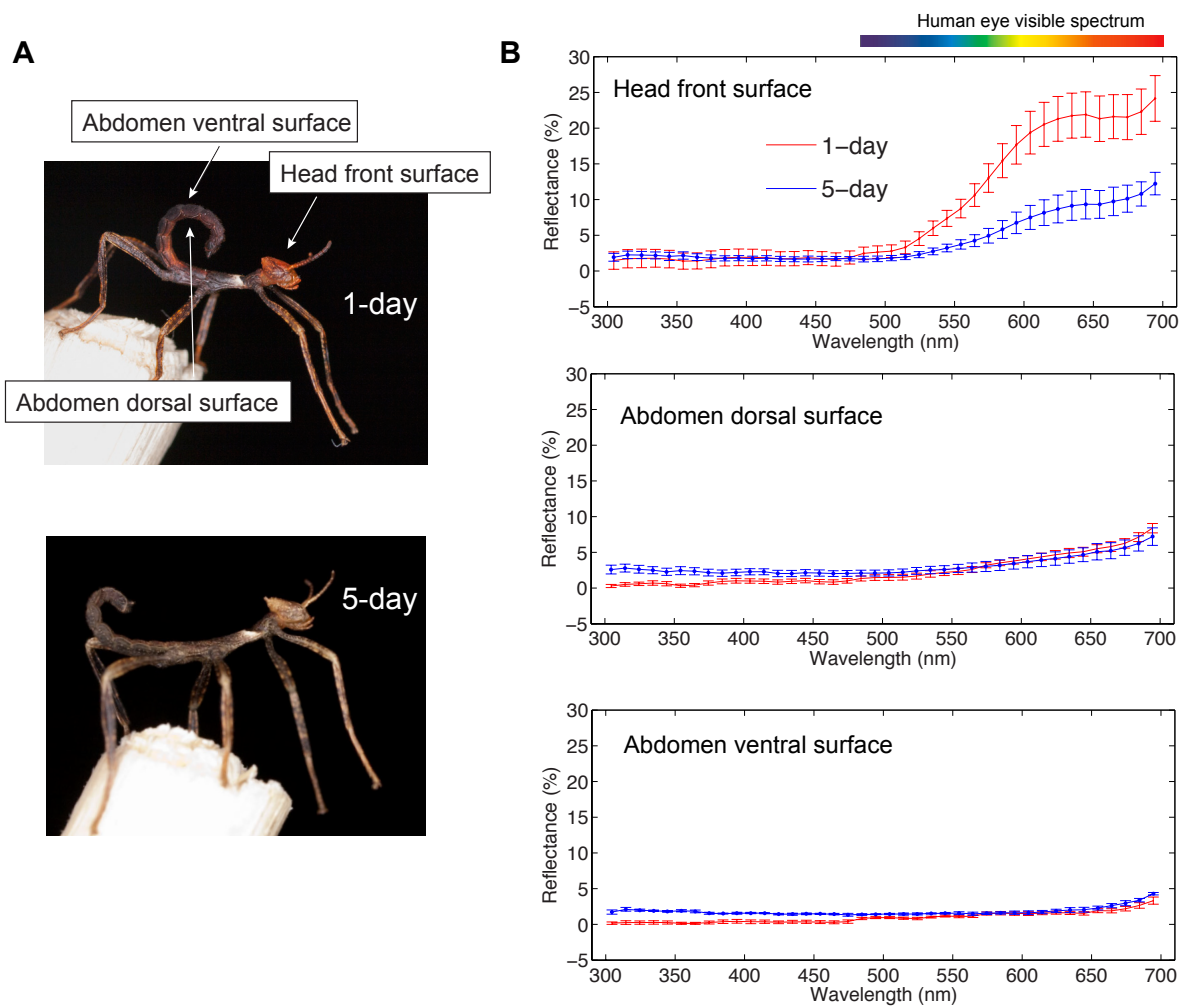

**Fig. S1. Ontogenetic loss of ant-mimicry coloration in first instar *E. tiaratum*.** (A) Comparison of coloration between a 1-day-old nymph and a 5-day-old nymph. Arrows denote three sampled spots. (B) Comparison of spectral reflectance profiles of three sampled spots between insects of two ages ( $N = 5$  individuals per age group), showing the ontogenetic loss of red coloration on head. Spectral reflectance was measured using a spectrophotometer (USB2000, Ocean Optics, Dunedin, FL, USA) with a deuterium-halogen light source (AIS Model MIMI DTA, Analytical Instrument Systems, Flemington, NJ, USA) calibrated with a diffuse white standard (Labsphere Inc., NH, USA). Values are means  $\pm$  S.D.

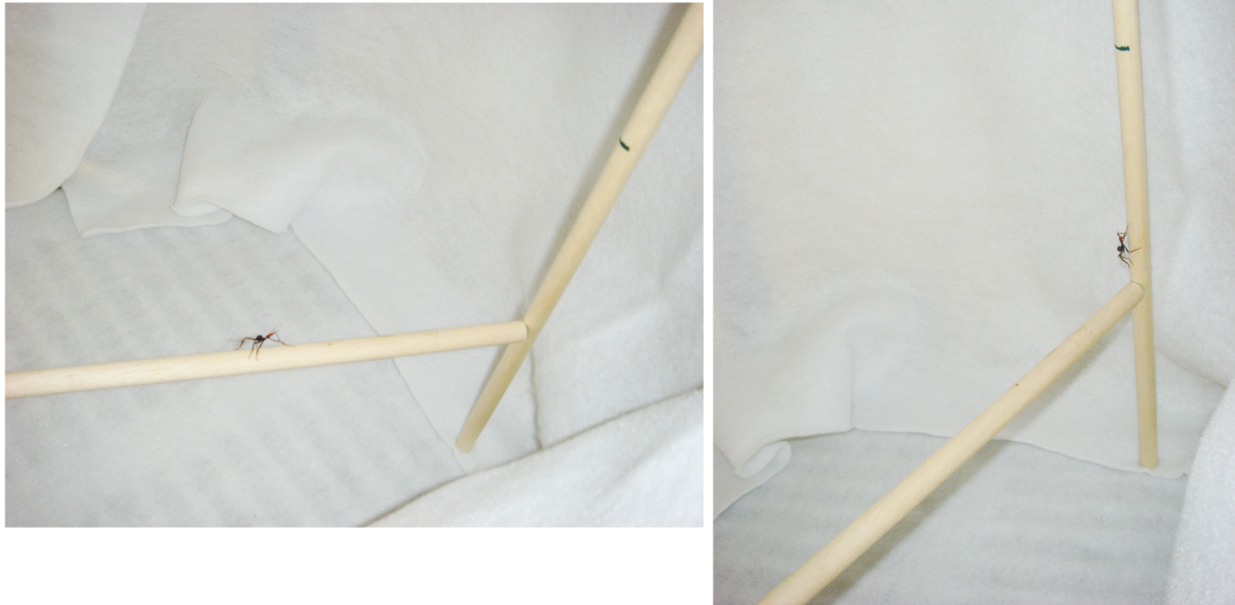

**Fig. S2.** Inner view of the experimental setup for recording gravitactic behaviors.

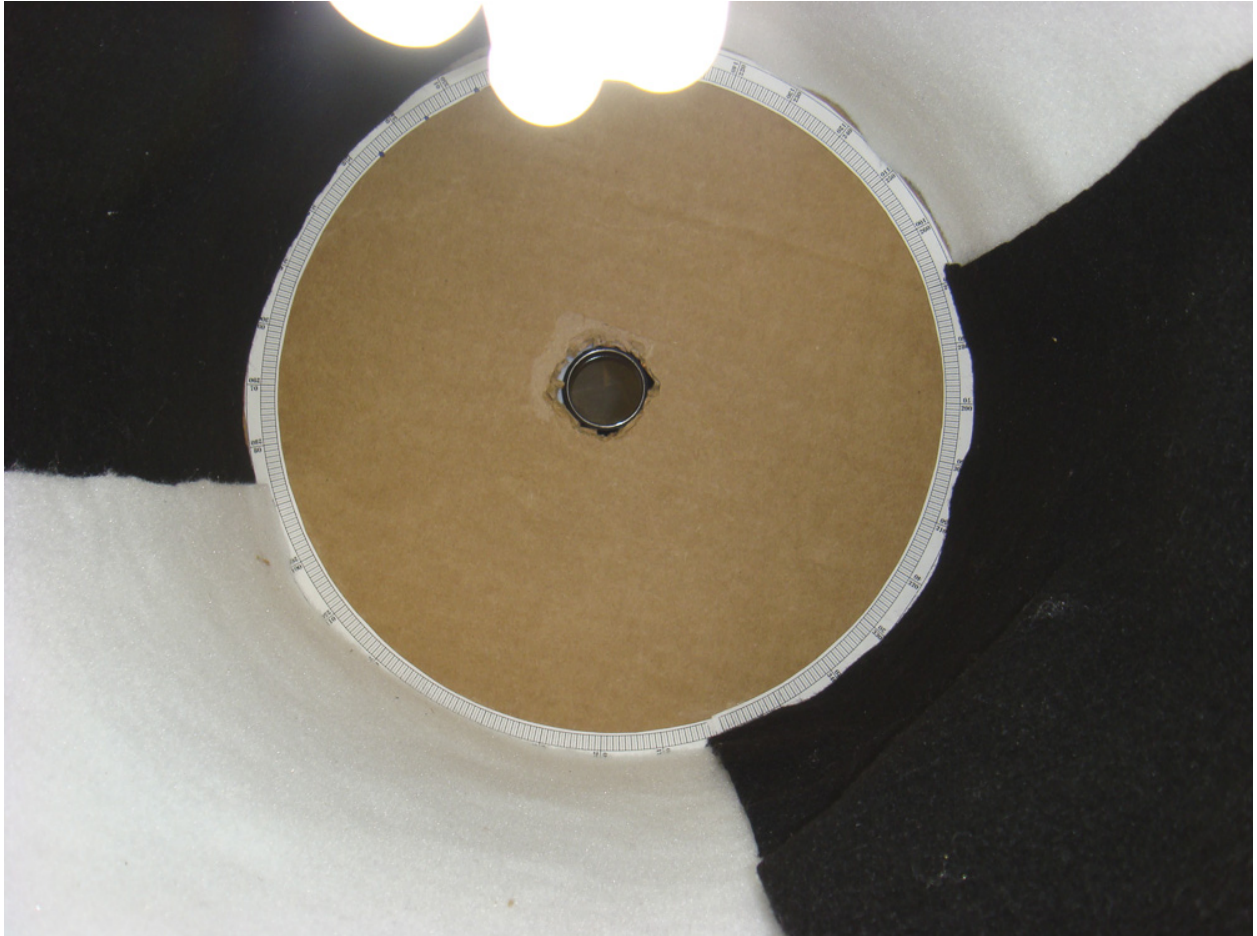

**Fig. S3.** Inner view of the experimental arena for recording tactic response to visual contrasts.
